# Supplementary material
Source: MDPI journal article supplement (https://www.mdpi.com/2073-4441/15/9/1710)
Supplement: s1 [file s1]

Text S1

Table S1. The description of borehole lithology

| layer | Stratum thickness | stratigraphic age symbol | Lithology   |
|-------|-------------------|--------------------------|-------------|
| 1     | 5.00              | Qh <sub>xk</sub>         | Silty clay  |
| 2     | 10.00             | Qh <sub>xk</sub>         | Coarse sand |
| 3     | 4.50              | Qh <sub>l</sub>          | Gravel      |
| 4     | 1.50              | K <sub>1</sub> L         | Gneiss      |
| 5     | 20.00             | K <sub>1</sub> L         | Gneiss      |
| 6     | 9.00              | K <sub>1</sub> L         | Granite     |
| 7     | 12.95             | K <sub>1</sub> L         | Granite     |

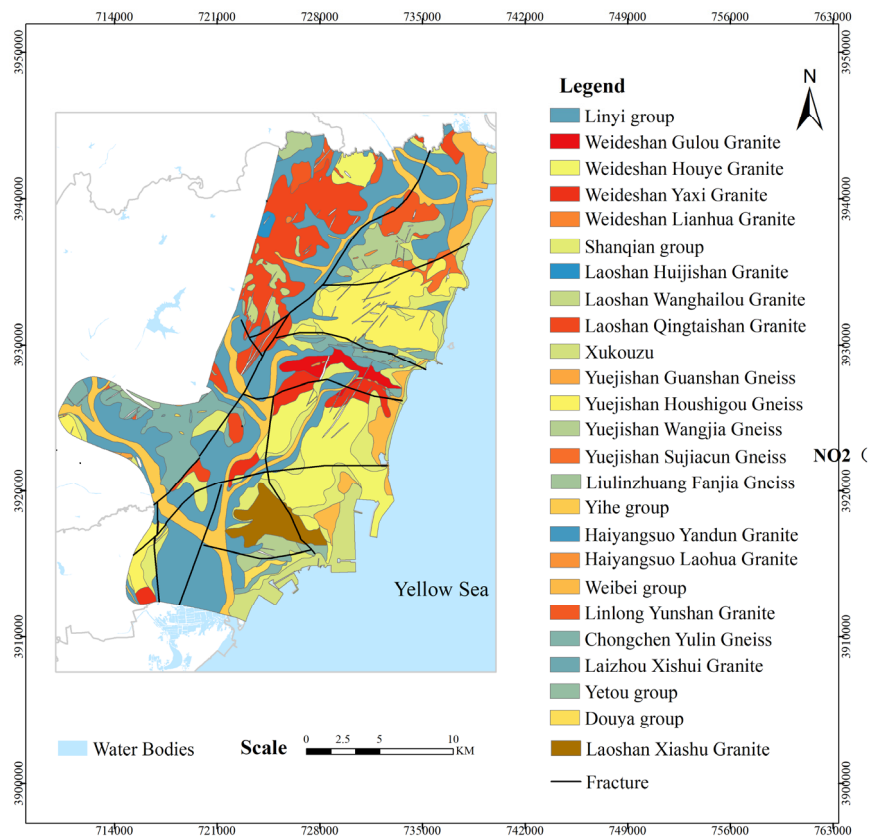

Figure S1. Geological map of the study area

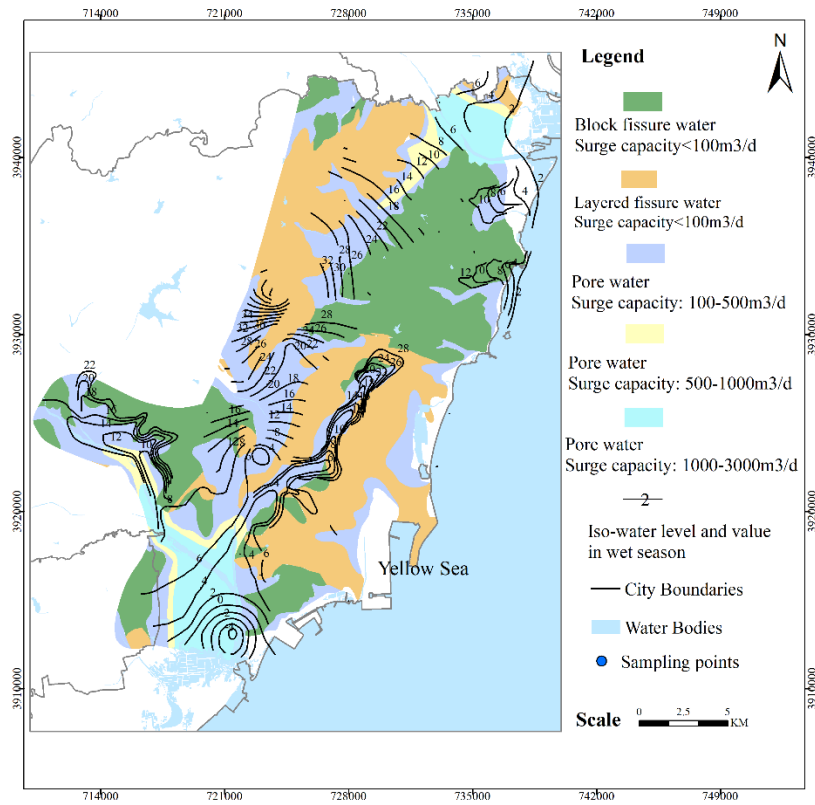

Figure S2. The distribution of groundwater flow field distribution in wet season

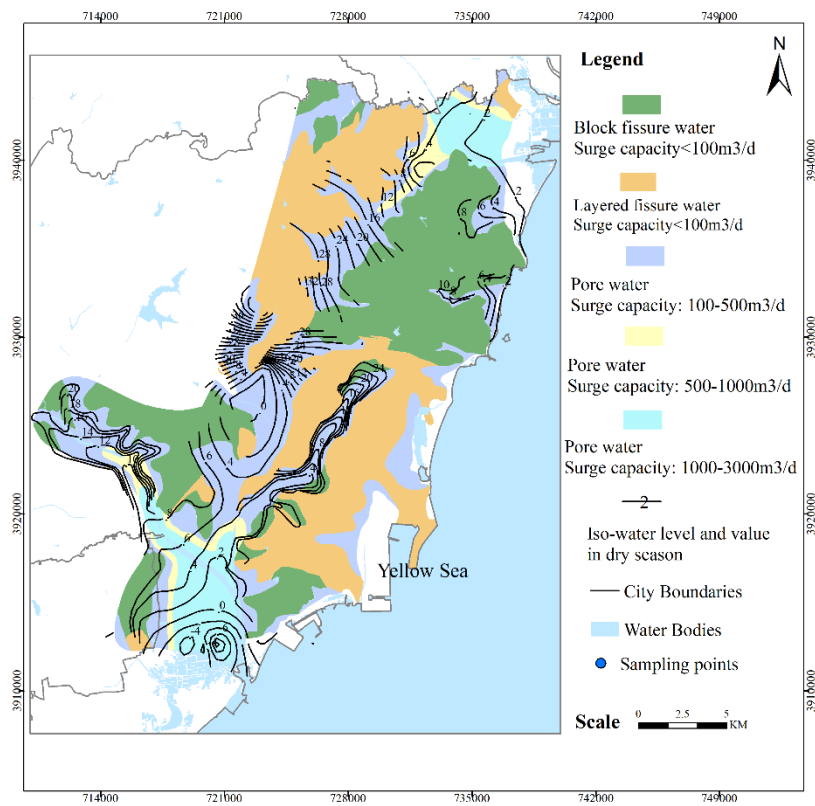

Figure S3. The distribution of groundwater flow field distribution in dry season
